# Supplementary material for: Ni–Co alloys via controlled pyrolysis of NiCo–MOF as heterogeneous hydrogenation catalysts
Source: Royal Society of Chemistry journal article supplement (doi:10.1039/d4nj00664j), 2024-01-01
Supplement: d4nj00664j1.pdf [file d4nj00664j1.pdf]

## Electronic Supplementary Information

### Ni-Co alloy *via* controlled pyrolysis of NiCo-MOF as heterogeneous hydrogenation catalyst

Lidan Deng,<sup>\*a,b</sup> Xingwang Liu,<sup>a</sup> Chong Chen,<sup>a</sup> Lu Wang,<sup>a</sup> Fan Liu,<sup>c</sup> and Jie Zhang<sup>\*a</sup>

<sup>a</sup>Chongqing Key Laboratory of Catalysis and New Environmental Materials, College of Environment and Resources, Chongqing Technology and Business University, Chongqing 400067, China.

<sup>b</sup>Engineering Research Center for Waste Oil Recovery Technology and Equipment, Ministry of Education, Chongqing Technology and Business University, Chongqing 400067, China.

<sup>c</sup>Chongqing Academy of Metrology and Quality Inspection, Chongqing, China.

**Table S1** The quality of Ni(NO<sub>3</sub>)<sub>2</sub>·6H<sub>2</sub>O, Co(NO<sub>3</sub>)<sub>2</sub>·6H<sub>2</sub>O, p-phthalic acid and triethylenediamine hexahydrate for the Ni<sub>x</sub>Co<sub>y</sub>-MOF.

| Samples                              | Ni(NO <sub>3</sub> ) <sub>2</sub> ·6H <sub>2</sub> O<br>(g) | Co(NO <sub>3</sub> ) <sub>2</sub> ·6H <sub>2</sub> O<br>(g) | p-phthalic acid<br>(g) | triethylenediamine<br>hexahydrate (g) |
|--------------------------------------|-------------------------------------------------------------|-------------------------------------------------------------|------------------------|---------------------------------------|
| Ni-MOF                               | 1.225                                                       | —                                                           | 0.700                  | 0.464                                 |
| Ni <sub>2</sub> Co <sub>1</sub> -MOF | 0.817                                                       | 0.409                                                       | 0.700                  | 0.464                                 |
| Ni <sub>1</sub> Co <sub>1</sub> -MOF | 0.613                                                       | 0.613                                                       | 0.700                  | 0.464                                 |
| Ni <sub>1</sub> Co <sub>2</sub> -MOF | 0.408                                                       | 0.818                                                       | 0.700                  | 0.464                                 |
| Co-MOF                               | —                                                           | 1.226                                                       | 0.700                  | 0.464                                 |

Notes: The readability accuracy and repeatability error of the weighing scale are 0.1mg and ±0.1mg, respectively.

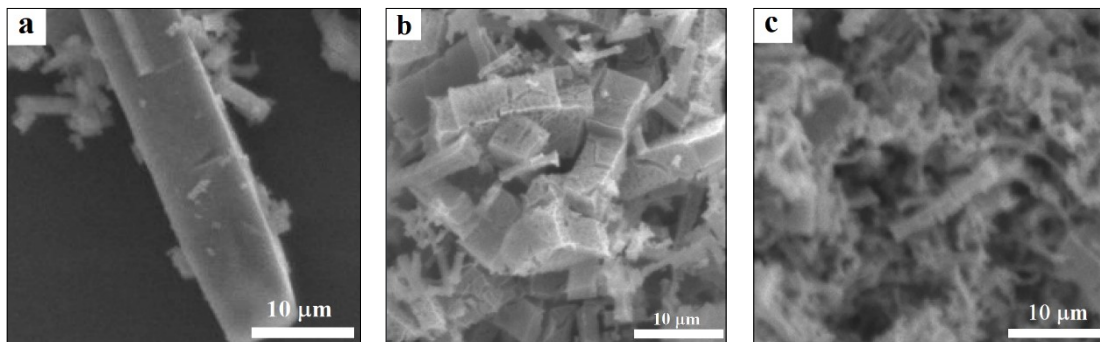

**Fig. S1** The SEM images of the catalysts (a)  $\text{Ni}_1\text{Co}_2/\text{MOF-300}$ , (b)  $\text{Ni}_1\text{Co}_2/\text{MOF-325}$ , and (c)  $\text{Ni}_1\text{Co}_2/\text{MOF-350}$ .
